# Supplementary material
Source: ML conference proceedings conference paper supplement (https://www.ecva.net/papers/eccv_2020/papers_ECCV/html/123470562_ECCV_2020_paper.php)
Supplement: Supplementary file 1 [file 123470562-supp.zip]

# Supplemental Material: Synthesis and Completion of Facades from Satellite Imagery

Xiaowei Zhang, Christopher May, Daniel Aliaga  
Purdue University, USA

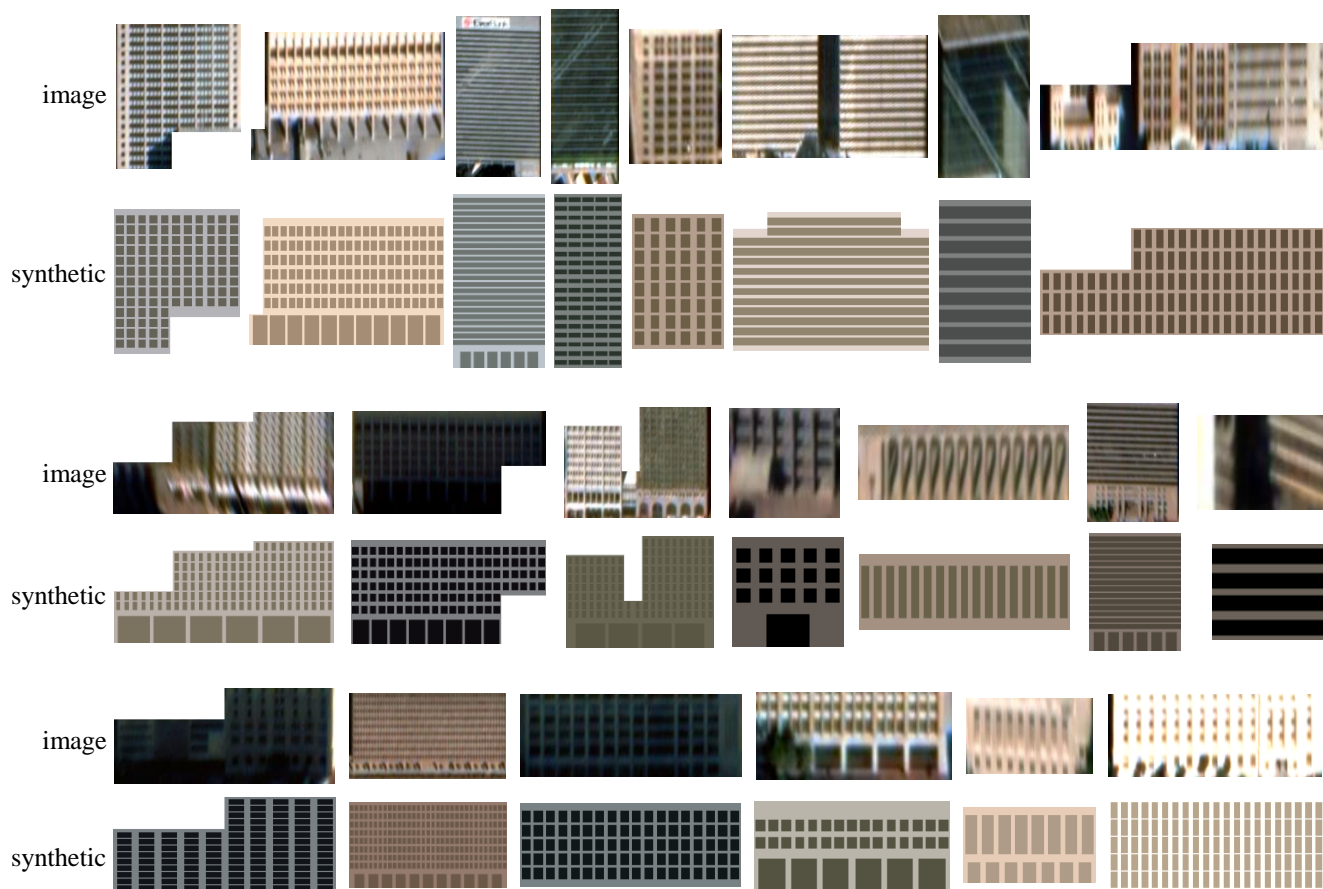

**Supplemental Figure 1:** *Example Facades.* We show satellite façade images and our synthesized facades in alternating rows.

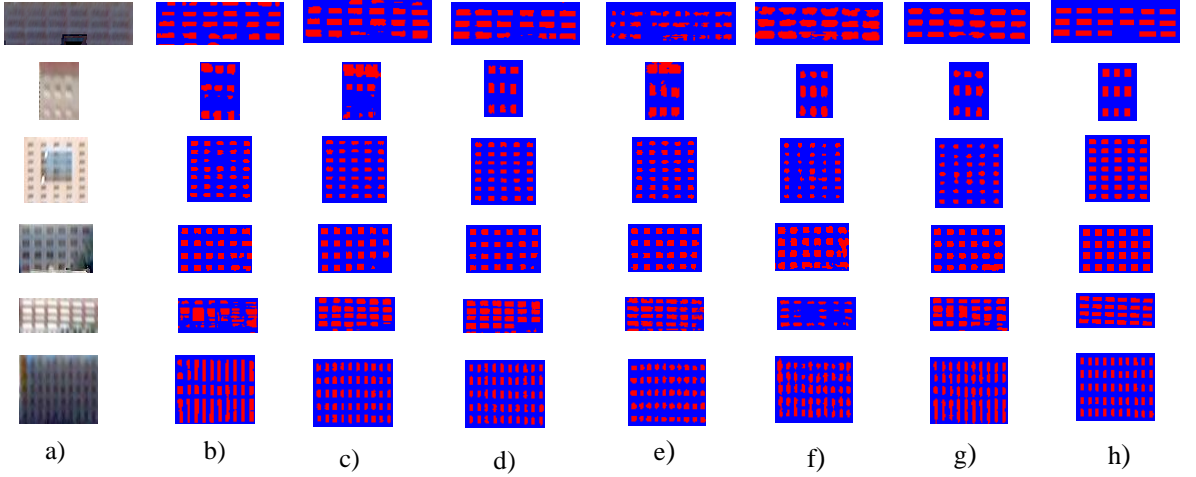

**Supplemental Figure 2:** *Segmentation Qualitative Comparison.* a) Original facades. b) to g) are corresponding to segmentation from Pix2Pix\_256, Pix2Pix\_128, Pix2Pix\_96, Pix2Pix\_64, DeepLab v3+ and EncNet respectively. h) Manually created segmentation ground truth.

**Supplemental Table 1:** *Segmentation Models.* We show configuration details for the segmentation models we trained from scratch.

| Models      | Input   | Output  | Generator/BackBone | Discriminator  | Batch Size | Training Time |
|-------------|---------|---------|--------------------|----------------|------------|---------------|
| Pix2Pix_256 | 256x256 | 256x256 | unet_256           | 70x70 PatchGAN | 1          | 2 hours       |
| Pix2Pix_128 | 128x128 | 128x128 | resnet_6blocks     | 70x70 PatchGAN | 1          | 2 hours       |
| Pix2Pix_96  | 96x96   | 96x96   | resnet_6blocks     | 34x34 PatchGAN | 1          | 2 hours       |
| Pix2Pix_64  | 64x64   | 64x64   | resnet_6blocks     | 34x34 PatchGAN | 1          | 2 hours       |
| DeepLab v3+ | 286x286 | 286x286 | xception_65        | –              | 4          | 1 day         |
| EncNet      | 286x286 | 286x286 | resnet101          | –              | 4          | 1 day         |

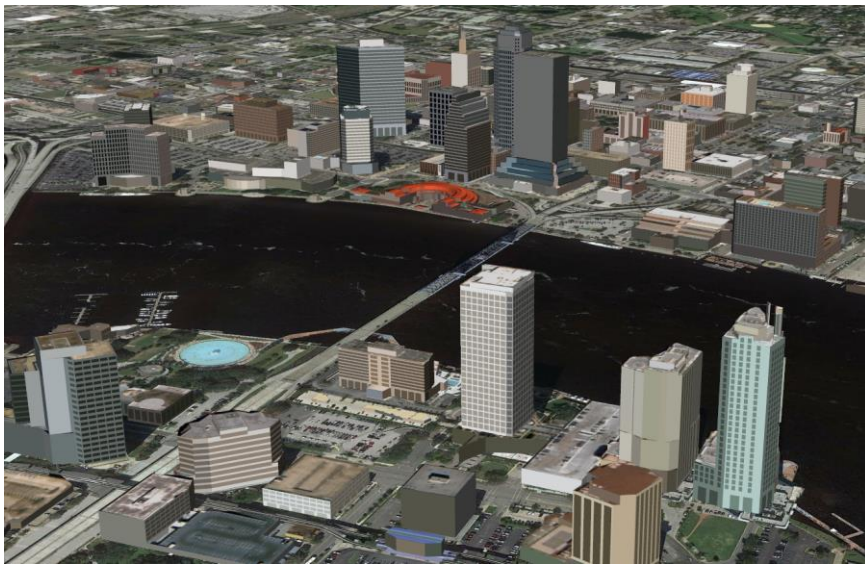

Our synthetic buildings rendered within Google Earth.

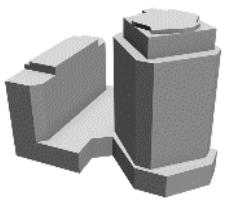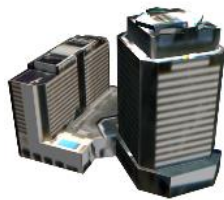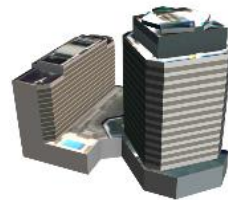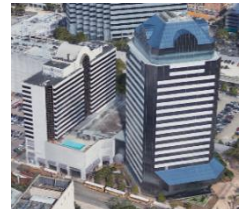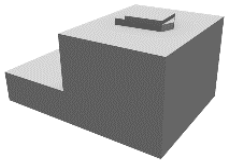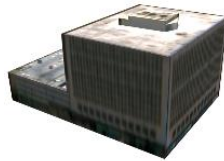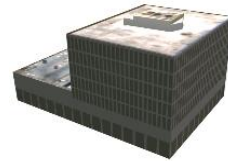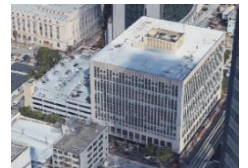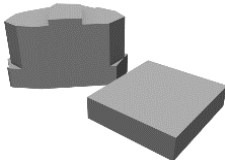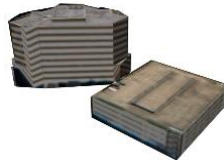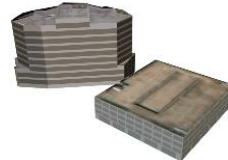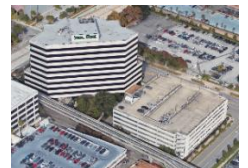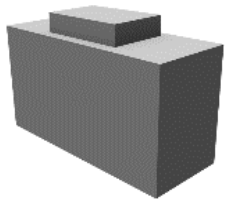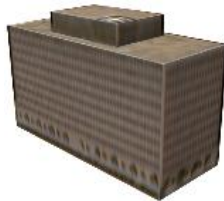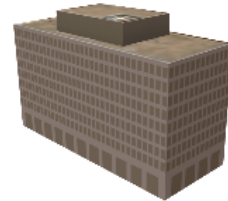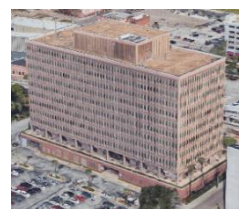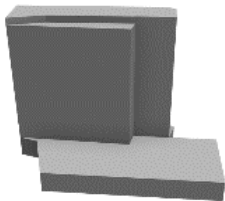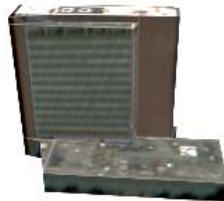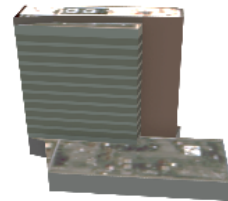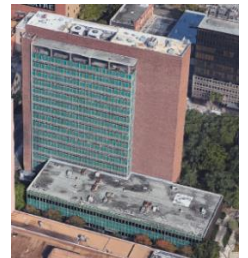

syn. building

proj. tex map

syn. facades

Google Earth comparison

**Supplemental Figure 3a: Buildings.** We show additional results of Area A1 and some building close-ups. Please note that the Google Earth comparison is *not* the input imagery – they are aerial images captured at much higher resolution and with the building facades at a much more head-on viewing angle.



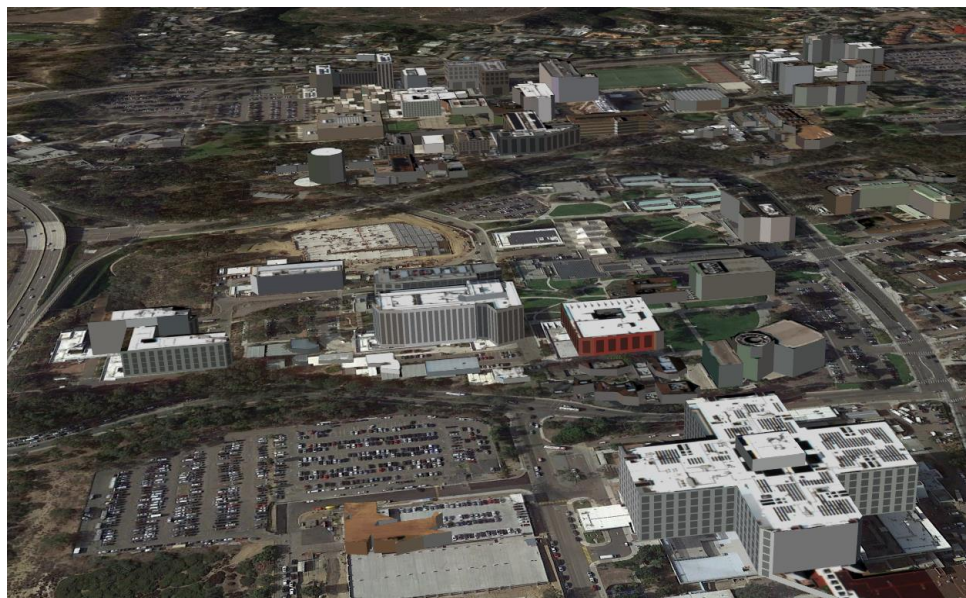

Our synthetic buildings rendered within Google Earth.

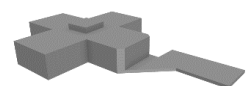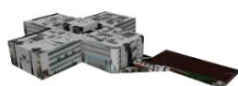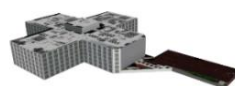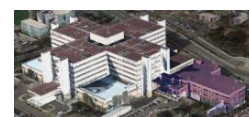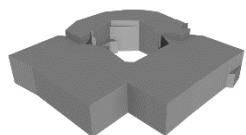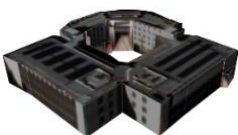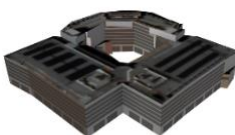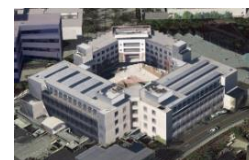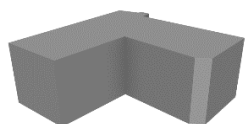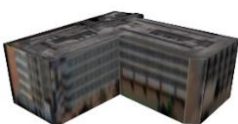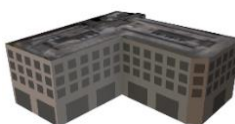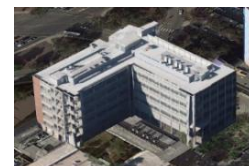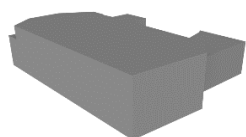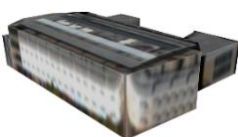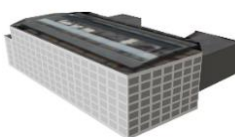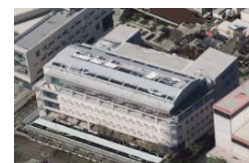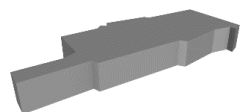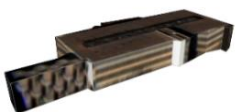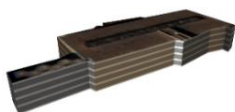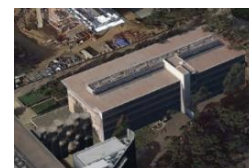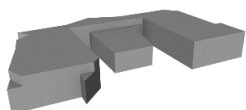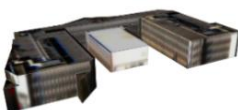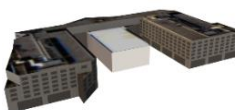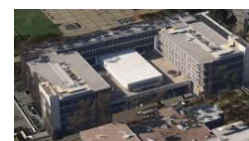

syn. building

proj. tex map

syn. facades

Google Earth comparison

**Supplemental Figure 3b: Buildings.** We show additional results of Area A2 and some building close-ups. Please note that the Google Earth comparison is *not* the input imagery – they are aerial images captured at much higher resolution and with the building facades at a much more head-on viewing angle.
